# Supplementary material for: Mori Ramulus (Chin.Ph.)—the Dried Twigs of Morus alba L./Part 1: Discovery of Two Novel Coumarin Glycosides from the Anti-Hyperuricemic Ethanol Extract
Source: MDPI journal article supplement (doi:10.3390/molecules24030629), 2019-02-11
Supplement: s1 [file s1]

# Supplement

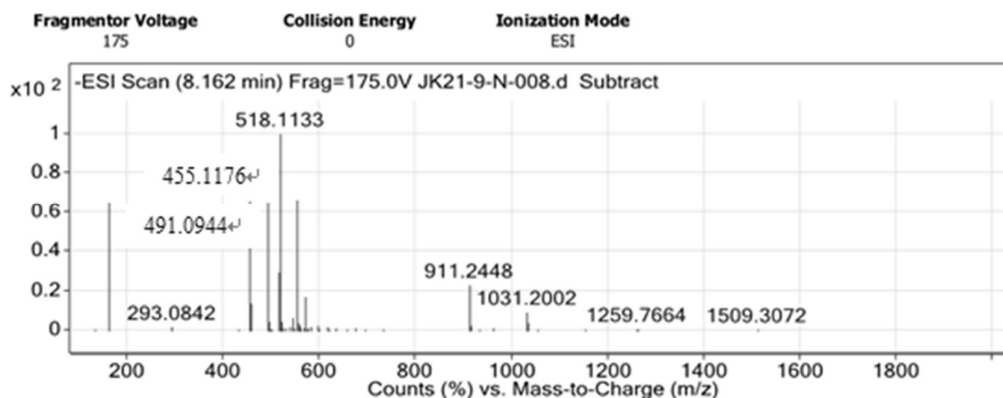

**Figure S1c.** Primary MS spectrum (negative ion mode) of the moriramulosid A peak in the HPLC chromatogram depicted in (Figure. 1b). Details of the HPLC-MS method see main text.

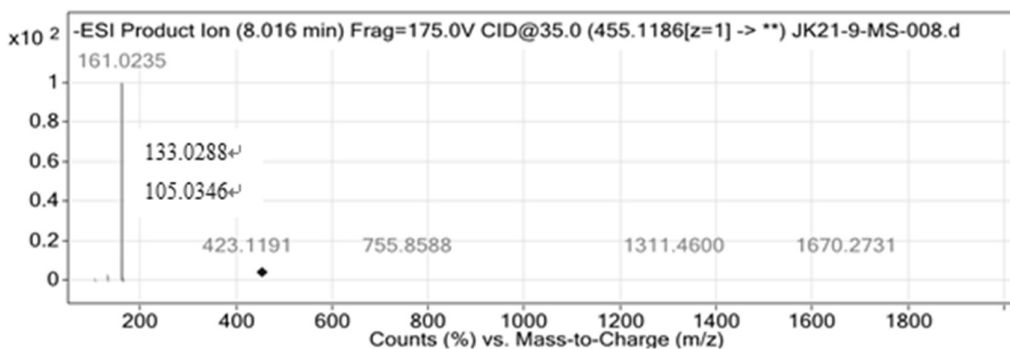

**Figure S1d.** Secondary MS spectrum (negative ion mode) of the moriramulosid A peak in the HPLC chromatogram depicted in (Fig. 1b). Details of the HPLC-MS method see main text.

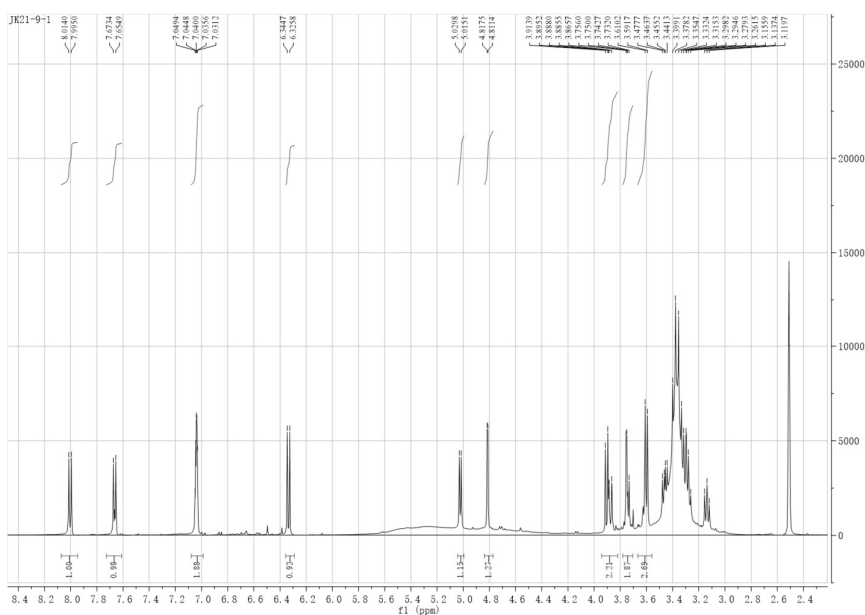

**Figure S1e.** <sup>1</sup>H-NMR of moriramulosid A. Details of the <sup>1</sup>H-NMR method see main text.

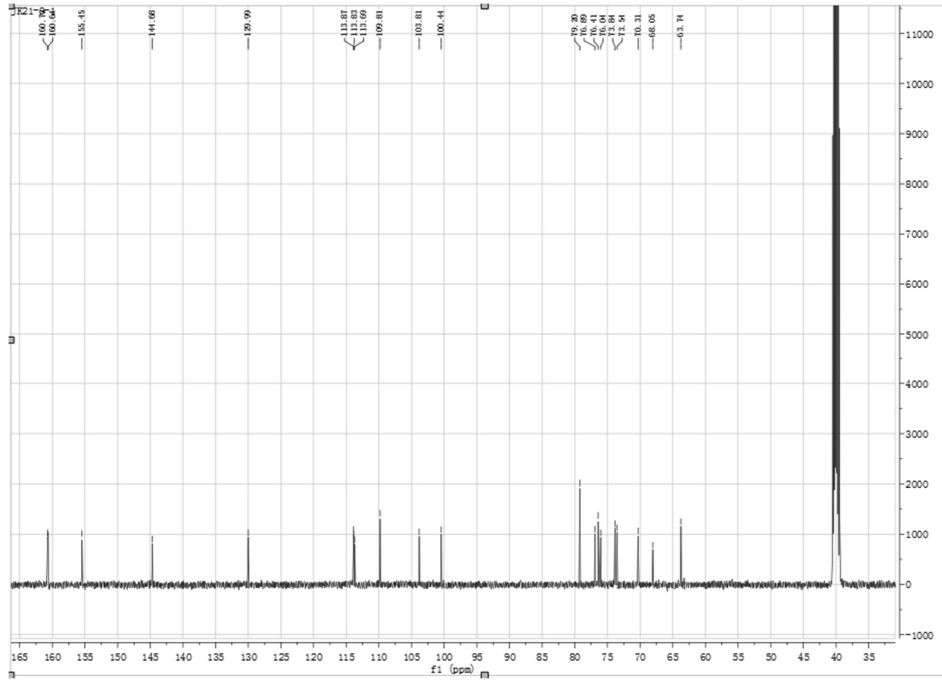

**Figure S1f.**  $^{13}\text{C}$ -NMR of moriramulosid A. Details of the  $^{13}\text{C}$ -NMR method see main text.

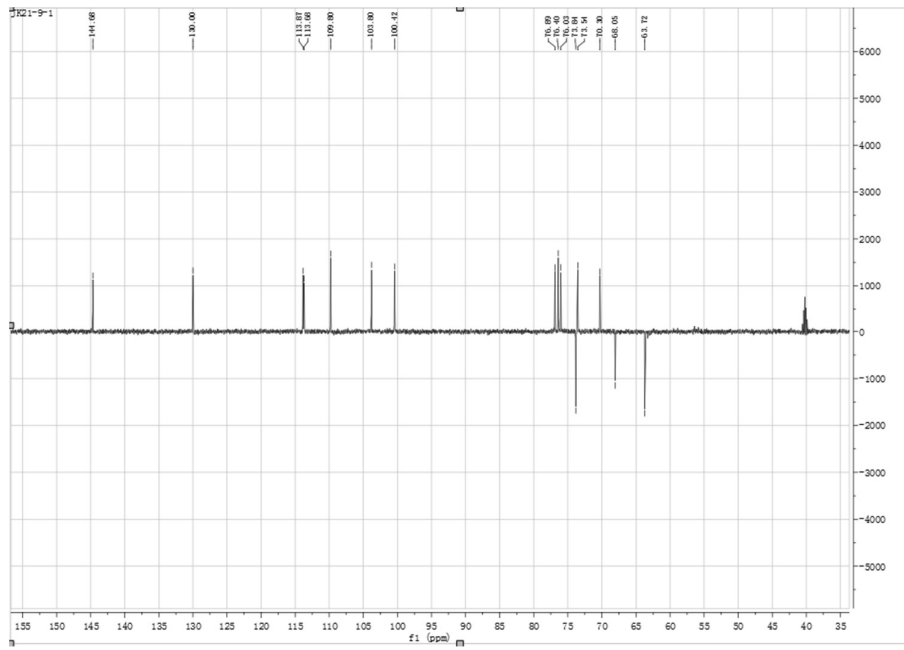

**Figure S1g.** DPT135  $^{13}\text{C}$ -NMR of moriramulosid A. Details of the DPT135  $^{13}\text{C}$ -NMR method see main text.

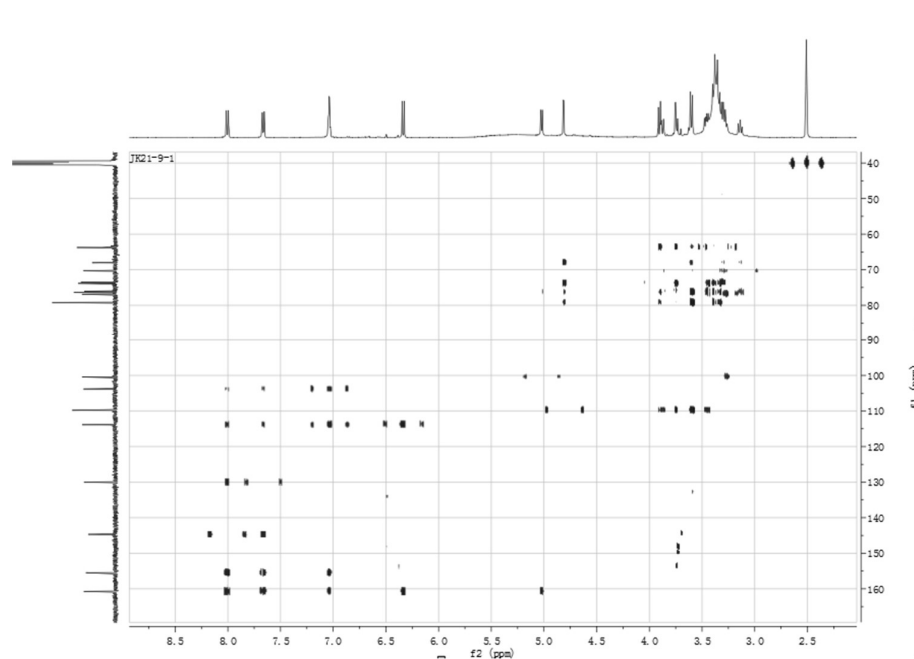

**Figure S1h.** Heteronuclear multiple-bond correlation spectroscopy (HMBC) NMR of moriramulosid A. Details of the HMBC method see main text.

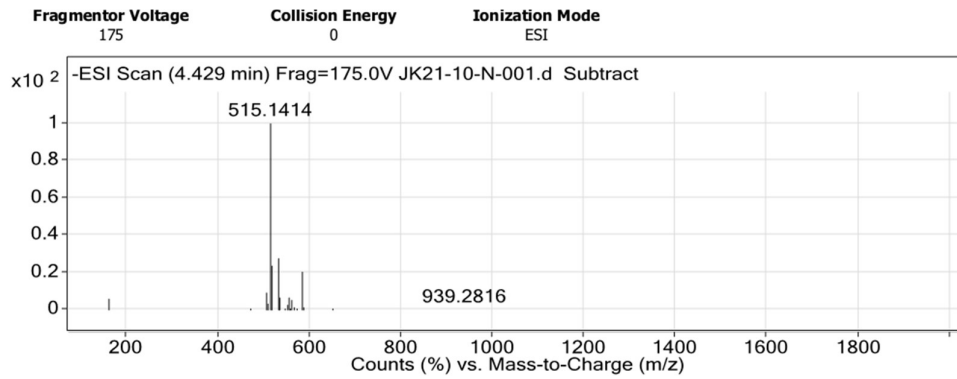

**Figure S2c.** Primary MS spectrum (negative ion mode) of the moriramulosid B peak in the HPLC chromatogram depicted in (Fig. 2b). Details of the HPLC-MS method see main text.

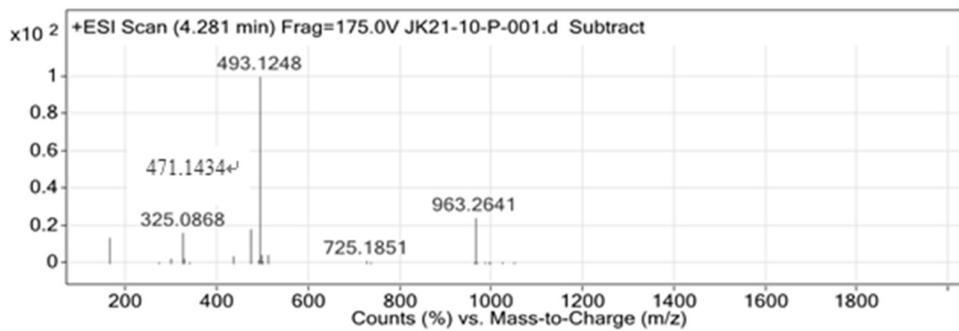

**Figure S2d.** Primary MS spectrum (positive ion mode) of the moriramulosid B peak in the HPLC chromatogram depicted in (Fig. 2b). Details of the HPLC-MS method see main text.

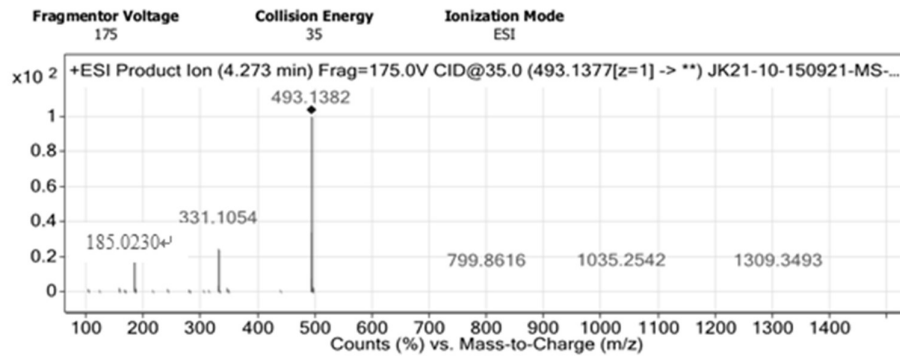

**Figure S2e.** Secondary MS spectrum (positive ion mode) of the moriramulosid B peak in the HPLC chromatogram depicted in (Fig. 2b). Details of the HPLC-MS method see main text.

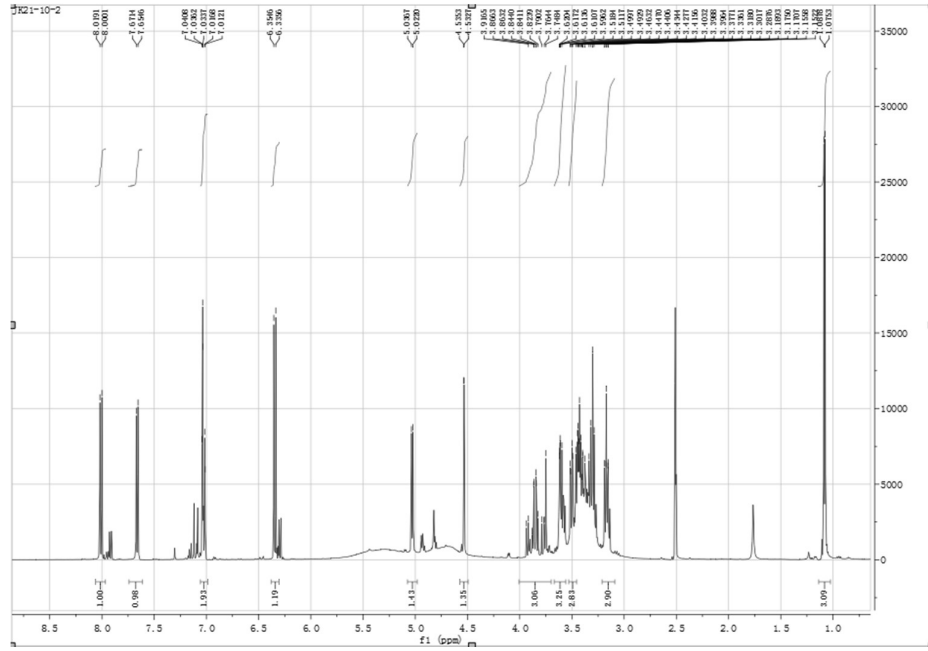

Figure S2f. <sup>1</sup>H-NMR of moriramulosid B. Details of the <sup>1</sup>H-NMR method see main text.

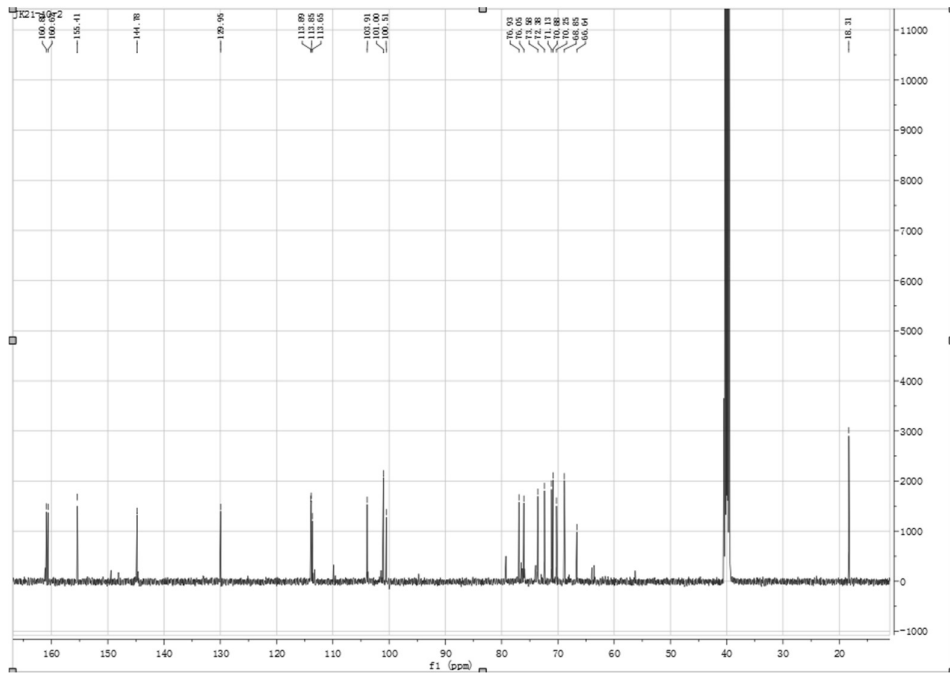

Figure S2g. <sup>13</sup>C-NMR of moriramulosid B. Details of the <sup>13</sup>C-NMR method see main text.

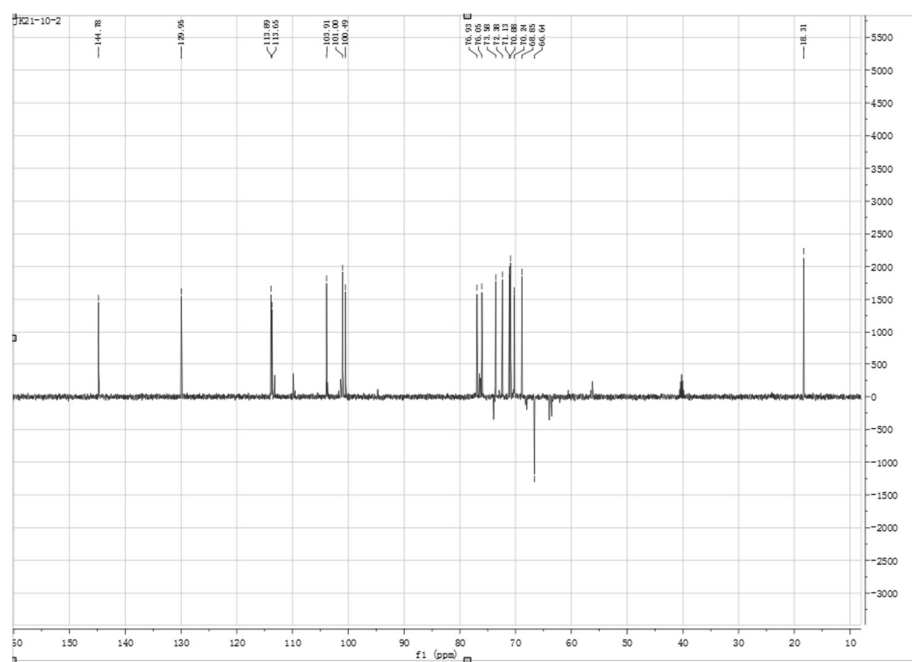

**Figure S2h.** DPT135  $^{13}\text{C}$ -NMR of moriramulosid B. Details of the DPT135  $^{13}\text{C}$ -NMR method see main text.

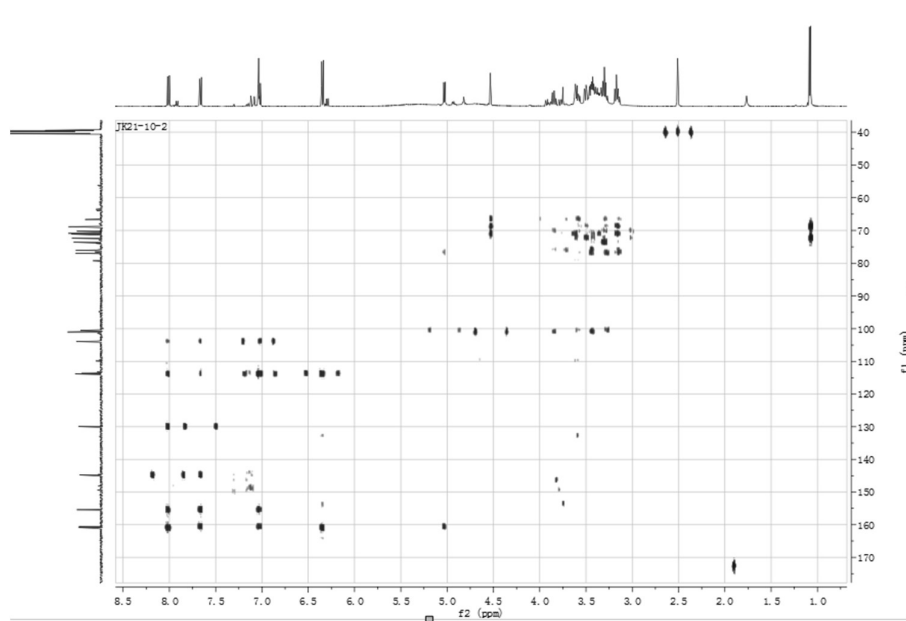

**Figure S2i.** Heteronuclear multiple-bond correlation spectroscopy (HMBC) NMR of moriramulosid B. Details of the HMBC method see main text.

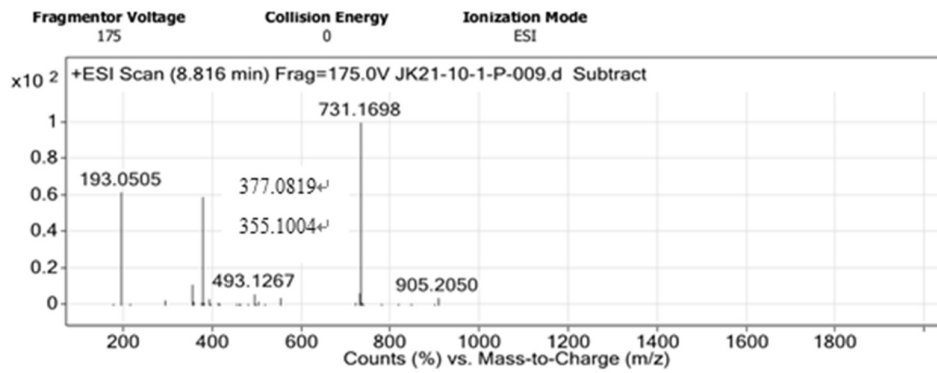

**Figure S3c.** Primary MS spectrum (positive ion mode) of the Scopolin peak in the HPLC chromatogram depicted in (Fig. 3b). Details of the HPLC-MS method see main text.

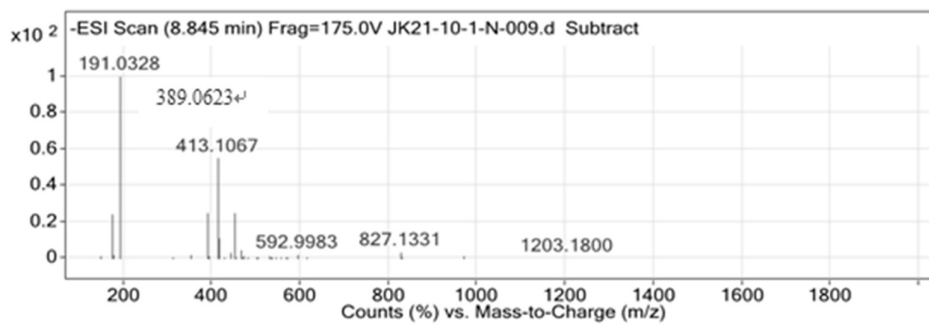

**Figure S3d.** Primary MS spectrum (negative ion mode) of the Scopolin peak in the HPLC chromatogram depicted in (Fig. 3b). Details of the HPLC-MS method see main text.

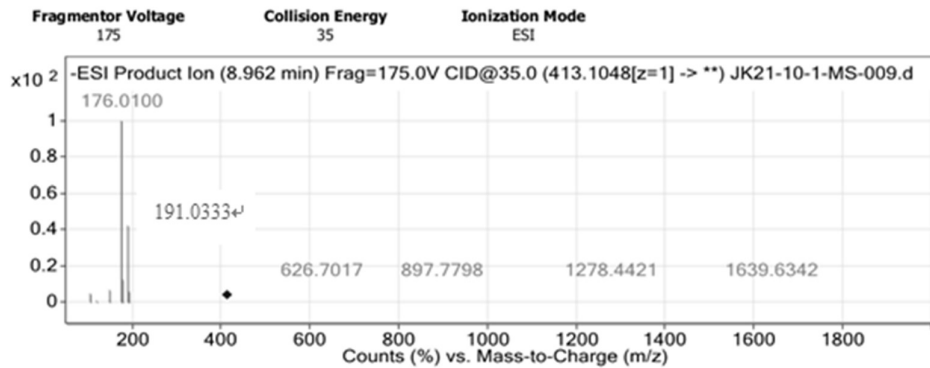

**Figure S3e.** Secondary MS spectrum (negative ion mode) of the Scopolin peak in the HPLC chromatogram depicted in (Fig. 3b). Details of the HPLC-MS method see main text.

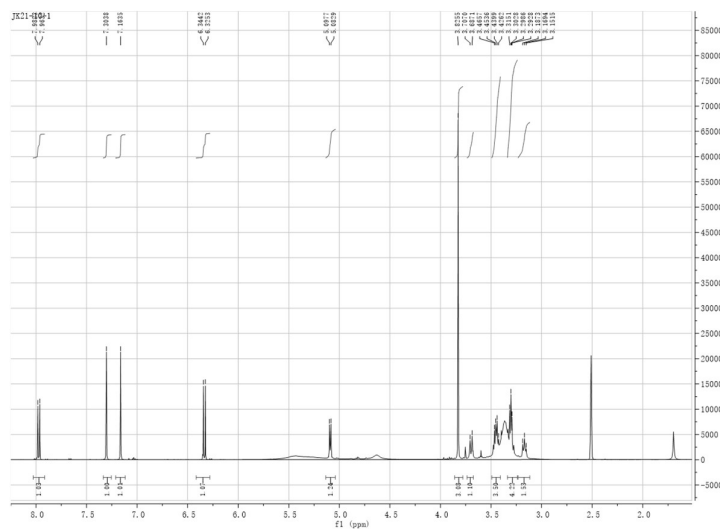

**Figure S3f.** <sup>1</sup>H-NMR of Scopolin. Details of the <sup>1</sup>H-NMR method see main text.

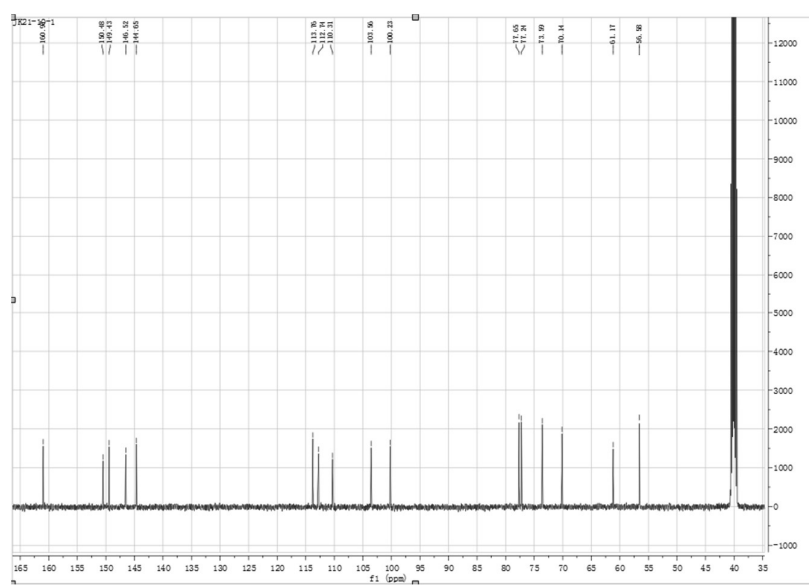

**Figure S3g.** <sup>13</sup>C-NMR of Scopolin. Details of the <sup>13</sup>C-NMR method see main text.

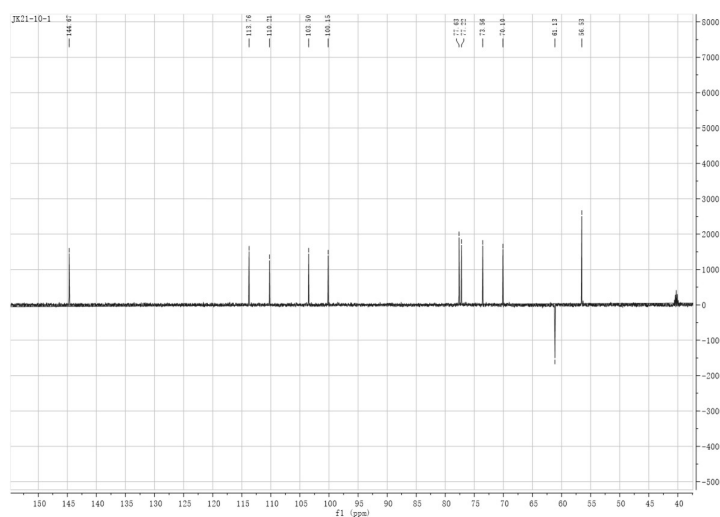

**Figure S3h.** DPT135 <sup>13</sup>C-NMR of Scopolin. Details of the DPT135 <sup>13</sup>C-NMR method see main text.
